# Supplementary material for: Lactococcus lactis Delivery of Surface Layer Protein A Protects Mice from Colitis by Re-Setting Host Immune Repertoire
Source: MDPI journal article supplement (doi:10.3390/biomedicines9091098), 2021-08-29
Supplement: s1 [file s1]

**Supplementary Materials:**

| Gene    | Sequence                           | Application | Reference                      |
|---------|------------------------------------|-------------|--------------------------------|
| IL-1b   | Forward: AAGGAGAACCAAGCAACGAC      | qPCR        | Lightfoot <i>et al.</i> , 2015 |
|         | Reverse: GAGATTGAGCTGTCTGCTCA      | qPCR        |                                |
| IL-17   | Forward: ACTACCTCAACCGTTCCACG      | qPCR        | This study                     |
|         | Reverse: TTCCCTCCGCATTGACACAG      | qPCR        |                                |
| PTGS2   | Forward: CATCCCCTTCCTGCGAAGTT      | qPCR        | This study                     |
|         | Reverse: CATGGGAGTTGGGCAGTCAT      | qPCR        |                                |
| Muc2    | Forward: GTGTGGGACCTGACAATGTG      | qPCR        | Lightfoot <i>et al.</i> , 2015 |
|         | Reverse: ACAACGAGGTAGGTGCCATC      | qPCR        |                                |
| Muc3    | Forward: GCCGTGAATTGTATGAACGGA     | qPCR        | Lightfoot <i>et al.</i> , 2015 |
|         | Reverse: CGCAGTTGACCACGTTGACTA     | qPCR        |                                |
| LTB4R1  | Forward: ATGGCTGCAAACACTACATCTCCT  | qPCR        | Lightfoot <i>et al.</i> , 2015 |
|         | Reverse: CACTGGCATAATGCTTATTCCAC   | qPCR        |                                |
| OCLDN   | Forward: GCTGTGATGTGTGTGAGCTG      | qPCR        | Lightfoot <i>et al.</i> , 2015 |
|         | Reverse: GACGGTCTACCTGGAGGAAC      | qPCR        |                                |
| TJP2    | Forward: ATGGGAGCAGTACACCGTGA      | qPCR        | Lightfoot <i>et al.</i> , 2015 |
|         | Reverse: TGACCACCCTGTCATTTTCTTG    | qPCR        |                                |
| TJP3    | Forward: TCGGCATAGCTGTCTCTGGA      | qPCR        | Lightfoot <i>et al.</i> , 2015 |
|         | Reverse: GTTGGCTGTTTTGGTGCAGG      | qPCR        |                                |
| 18s RNA | Forward: ATAGCTGTATATTAAAGTTG      | qPCR        | Sahay <i>et al.</i> , 2009     |
|         | Reverse: GTCCTATTCATTATTCC         | qPCR        |                                |
| R110    | Forward: AATGCAACCATAACTGCCGC      | qPCR        | This study                     |
|         | Reverse: TGTTGCGCCTGAGGTAACAT      | qPCR        |                                |
| NCK2187 | Forward: CCAGCTATTGCCGGTAACCTT     | qPCR        | This study                     |
|         | Reverse: AACGGCAGTAGTGCTACCAG      | qPCR        |                                |
| 123     | GCATGCTCGAGTCTAGAAGTCTTATAACTATAC  | PCR         | This study                     |
| 126     | GTCGACCGGTTTATCGAAAATTAGCTACTTTTAC | PCR         | This study                     |
| 132     | GACCGCCTTTCCGTTATTATCC             | PCR         | This study                     |
| 133     | TGGGGCGGAAGTGGAATACTTATGG          | PCR         | This study                     |

**Supplemental Table S1:** List of primers used in this study

## Supplementary Materials:

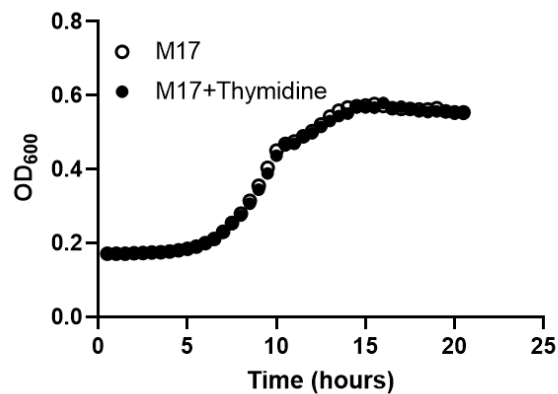

**Supplemental Figure S1:** Representative growth curve of wild type *L. lactis* clone in M17 media with and without thymidine supplementation. Bacteria were incubated with the M17 media with and without thymidine supplementation in a 96 well plate, and growth was measured by OD600nm in every 30 minutes for 20 hours.

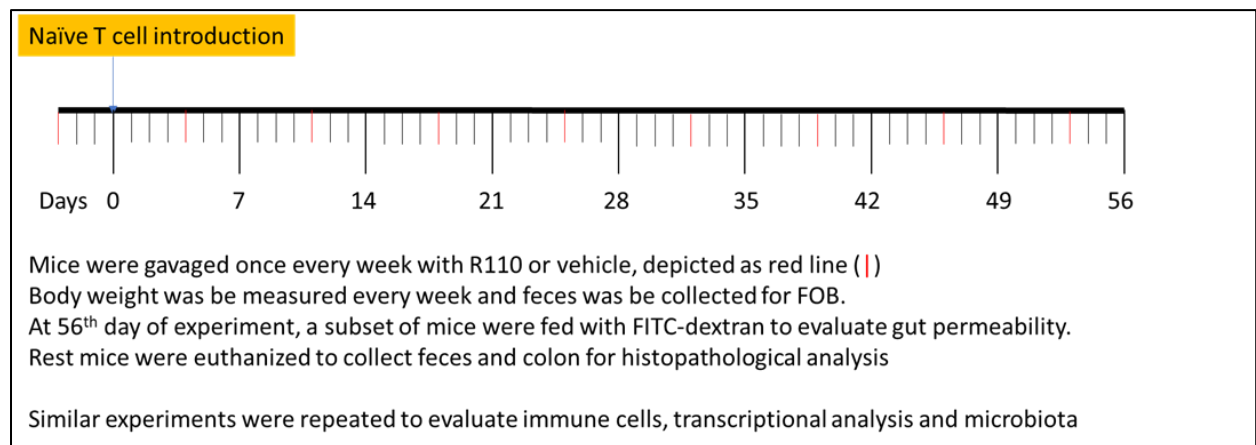

**Supplemental Figure S2.** A graphical representation of the mice experiment. Rag1<sup>-/-</sup> mice have injected with  $5 \times 10^5$  naïve CD4 T cells (CD3<sup>+</sup>CD4<sup>+</sup>CD45RB<sup>Hi</sup>) three days post-initiation of R110 or vehicle. Later, mice were fed with 1 billion CFU of R110 every week, as depicted in the red line. Mice were weighed every week, and feces were collected for FOB scoring. At the end of the experiment, a subset of mice was fed with FITC-dextran to observe its presence in feces as a measure of gut barrier integrity. The rest of the mice were euthanized to collect tissues and serum for analysis. Similar experiments were repeated to measure immune cells in lamina propria and microbiota analysis.

Supplementary Materials:

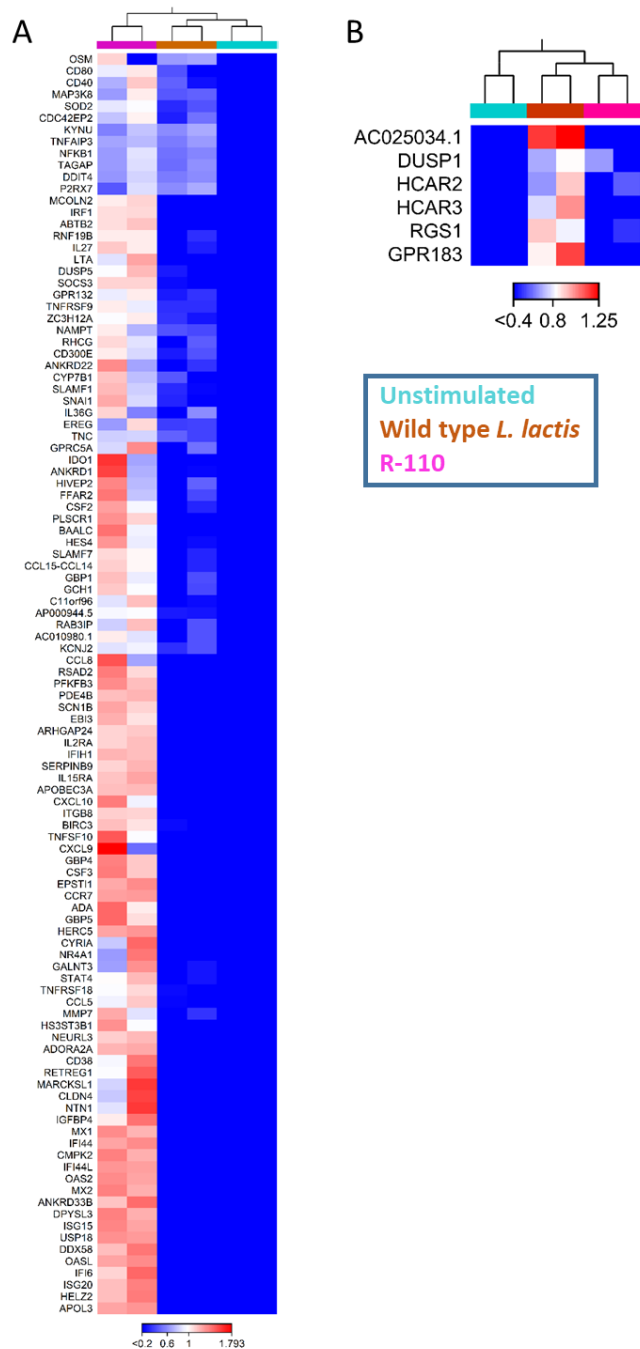

**Supplemental Figure S3:** Human dendritic cells were stimulated with R110, *Lactococcus lactis* strain at ratio of 1, or left unstimulated. Total isolated RNA was sequenced using Novaseq at a commercial site. The transcriptomic data were analyzed using CLC genomic workbench V 20. The data showed all the unique genes differentially expressed in DC exposed to R110 (A) and six genes that only expressed in DC exposed to wild-type *Lactococcus lactis*. Duplicate samples were used for each condition.
